# Supplementary material
Source: PubMed Central journal article supplement (PMC8669691)
Supplement: mmc1.pdf [file mmc1.pdf]

## **Epidemiología, fisiopatología y clasificación de los síntomas neurológicos post-COVID**

Francisco Javier Carod-Artal, MD, PhD, FAAN\*

Raigmore hospital, NHS Highlands, Inverness, Reino Unido

[javier.carodartal@nhs.scot](mailto:javier.carodartal@nhs.scot)

Juan Carlos García-Moncó, MD, PhD, FAAN\*

Servicio de Neurología

Hospital Universitario de Basurto, Bilbao.

[hospit05@sarenet.es](mailto:hospit05@sarenet.es)

Autor correspondencia

Juan Carlos García-Moncó

[hospit05@sarenet.es](mailto:hospit05@sarenet.es)

\*Ambos autores contribuyeron de forma similar a este documento.

### **Resumen:**

**Introducción:** El término “síndrome post-COVID” se emplea para describir una serie de signos y síntomas crónicos que pueden surgir tras la infección por el virus SARS-CoV-2, como fatiga, disnea, dolor torácico, palpitaciones, ansiedad, depresión, dolores articulares y musculares entre otros. El objetivo es revisar las controversias asociadas al síndrome post-COVID-19, la frecuencia de los síntomas neurológicos y su posible fisiopatología.

**Métodos:** Revisión narrativa crítica de los estudios publicados desde el inicio de la pandemia en pubmed (enero 2020 a julio 2021).

**Resultados:** Síntomas neurológicos persistentes (quejas cognitivas, problemas de memoria y concentración; cefalea, anosmia, ageusia, vértigo, insomnio, etc) se han descrito en personas que padecieron COVID-19. El síndrome post-COVID-19 no es una entidad homogénea y no tiene una definición universalmente aceptada, lo que explica la variación en las estimaciones sobre prevalencia (2,3%-85%) y duración de los síntomas. Los criterios que lo distinguen del síndrome de fatiga crónica o el síndrome del paciente crítico son ambiguos. Los factores de riesgo incluyen edad, sexo (mujer), comorbidades, y número de síntomas en la fase aguda. La fisiopatología es en gran medida desconocida, pero probablemente multifactorial, incluyendo mecanismos inmunológicos, disfunción de redes neuronales y alteración de neurotransmisores, daño viral persistente, y cuadros de origen funcional, entre otros.

**Conclusiones:** Los síntomas post-COVID-19 pueden surgir tras padecer una infección leve o incluso asintomática, y causa limitaciones en las actividades de la vida diaria y calidad de vida. El progreso en la investigación nos ayudará a aclarar el origen y manejo de estas complejas alteraciones neurológicas.

**Palabras clave:**

Coronavirus, COVID-19, SARS-CoV-2, Síndrome post-COVID, Síntomas neurológicos

**Epidemiology, pathophysiology, and classification of the neurological symptoms of post-COVID-19 syndrome**

**Abstract**

**Introduction:** Post-COVID-19 syndrome is a series of chronic signs and symptoms that may appear after SARS-CoV-2 infection, including fatigue, dyspnoea, chest pain, palpitations, anxiety, depression, and joint and muscle pain. The purpose of this study was to review the controversies on post-COVID-19 syndrome, the frequency of neurological symptoms, and the potential pathophysiological mechanisms.

**Methods:** We present a narrative review of studies published in PubMed since the beginning of the pandemic (January 2020 to July 2021).

**Results:** Patients with history of COVID-19 have been found to present persistent neurological symptoms, including cognitive complaints, memory and concentration problems, headache, anosmia, ageusia, vertigo, and insomnia. Post–COVID-19 syndrome is a heterogeneous disease that lacks a universally accepted definition, which may explain the great variability in the estimated prevalence (2.3%-85%) and symptom duration. The criteria differentiating post–COVID-19 syndrome from chronic fatigue syndrome or critical illness syndrome are ambiguous. Risk factors include older age, female sex, certain comorbidities, and greater number of symptoms in the acute phase. The pathophysiology of the syndrome is largely unknown, although it is probably multifactorial, including immunological mechanisms, neural network dysfunction, neurotransmitter alterations, persistent viral damage, and functional impairment.

**Conclusions:** Post–COVID-19 syndrome may present after mild or even asymptomatic SARS-CoV-2 infection, causing limitations in activities of daily living and in quality of life. Further research will clarify the origin and most appropriate management of these neurological alterations.

**Keywords:**

Coronavirus; COVID-19; SARS-CoV-2; post–COVID-19 syndrome; neurological symptoms

## 1. INTRODUCCIÓN

A fecha de 21 de julio de 2021, la pandemia causada por el coronavirus tipo 2 asociado al síndrome respiratorio agudo grave (SARS-CoV-2) continúa su expansión, con más de 192 millones de casos confirmados y 4,1 millones de fallecidos [1]. Un gran número de personas que sobreviven no tiene una recuperación completa tras sufrir la enfermedad (COVID-19) y continúan presentado síntomas nuevos o persistentes y una afectación funcional notable durante semanas y/o meses, con independencia del nivel de gravedad de la infección inicial [2]. Entre estas alteraciones se anticiparon las de origen neurológico [3, 4].

La persistencia de síntomas crónicos pasada la fase de convalecencia tras una infección vírica es conocida y se ha descrito con numerosos virus, entre ellos los virus de Epstein-Barr, Coxsackie, Dengue o Ebola, y con otros coronavirus humanos [5]. La etiología post-infecciosa/inmune se considera una posible causa del síndrome de fatiga crónica, y de otros síndromes con síntomas similares, como el síndrome post-tratamiento de la enfermedad de Lyme (*PTLDS*), en el que algunos pacientes que han padecido una enfermedad de Lyme presentan síntomas persistentes no específicos, como fatiga, dolor, o alteración cognitiva tras la resolución de la infección [6]. Como en

la COVID-19, no hay evidencia de infección activa y por tanto no se benefician de tratamiento antibiótico prolongado. Síntomas similares pueden aparecer en pacientes que han padecido una sepsis grave u otras infecciones virales. El avance en el conocimiento de los mecanismos implicados en unos podría arrojar luz para los otros.

Los estudios de seguimiento de supervivientes de la pandemia previa causada por el SARS-CoV en 2002 son ilustrativos del problema, ya que la mitad de los supervivientes padecían fatiga y trastornos del sueño después de 12 meses de la infección inicial [7].

En este artículo se revisan las controversias asociadas al síndrome post-COVID-19, la frecuencia de los síntomas neurológicos post-COVID-19 y su posible fisiopatología.

## 2. DIFICULTADES METODOLÓGICAS

Existe una cierta confusión en torno a la nomenclatura empleada para describir la persistencia de los síntomas tras padecer COVID-19. Diversos términos como “síndrome post-COVID”, “COVID persistente”, “COVID en curso”, “COVID prolongado”, etc., se usan de modo indistinto en la literatura, sin que se haya evaluado la validez de estas definiciones. La guía NICE de 2020 sobre “Síndrome post-COVID-19” ha definido esta entidad (**tabla 1**), y la distingue de la fase aguda (COVID-19), cuyos síntomas duran hasta cuatro semanas, y de la COVID-19 “sintomática o en curso”, cuyos síntomas duran entre cuatro y 12 semanas [8]. Sin embargo, el término “Síndrome post-COVID-19” es en sí mismo ambiguo, ya que se desconoce la historia natural de esta entidad, por lo que la definición del tiempo de inicio y persistencia de los síntomas es arbitraria. Además pueden aparecer síntomas nuevos después de la infección inicial.

El Centro de Control y prevención de Enfermedades (CDC) de los EEUU distingue al menos tres alteraciones del estado de la salud que persisten más de cuatro semanas tras la infección inicial por el SARS-CoV-2: 1) la presencia de síntomas crónicos, consecuencia del daño de múltiples órganos; 2) síntomas y secuelas consecuencia del tratamiento de la COVID-19 o de la hospitalización prolongada, que en su forma más grave incluye el síndrome del paciente crítico ingresado en unidad cuidados intensivos; 3) la aparición de síntomas crónicos combinados en diferente proporción y que afectan tanto a pacientes con COVID-19 leve o moderado que no necesitaron ingreso hospitalario como a aquellos que fueron hospitalizados [9].

El diseño, metodología y calidad de los estudios publicados sobre los síntomas post-COVID-19 presenta notables variaciones, lo que dificulta su interpretación y comparación. En la **tabla 2** se resumen algunas de las principales limitaciones metodológicas que afectan a la población de estudio, la definición del síndrome, su gravedad, los síntomas que lo constituyen, y los intervalos de seguimiento de los mismos [10]. La proporción de sujetos que padecen síntomas persistentes post-COVID-19 varía según el tipo de estudio y el momento de análisis: se describe en un 27% a los 60 días [11]; 13,7% a los 84 días [12]; 37,7% a las 12 semanas [13]; 53% a los 4 meses [14]; 46% a los 6 meses [15]; ó 34,7% a los 7 meses [16]. Un problema metodológico de los estudios basados en síntomas auto-reportados es que la lista de síntomas son comunes y no específicos de la COVID-19. Además, los valores absolutos hay que tomarlos con precaución ya que se desconoce la prevalencia real de estos síntomas en la población general.

## 3. ESTUDIOS EPIDEMIOLÓGICOS

Muchas personas que tuvieron una infección por SARS-CoV-2 leve padecen síntomas cíclicos o persistentes. El “Estudio de los Síntomas COVID-19” ha analizado los síntomas que registraron más de 4 millones de personas en Estados Unidos, Reino Unido y Suecia en una aplicación de Smartphone; se estima que al menos el 10% que dieron positivo tuvo síntomas crónicos con una duración superior a las tres semanas[17].

Ya que no existe una definición universal aceptada sobre el síndrome post-COVID-19, y debido a que este concepto incluye un amplio abanico de síntomas a veces inespecíficos (fatiga, mialgias, dificultad de concentración, etc.), algunos estudios sugieren realizar estimaciones basadas en síntomas auto-referidos por los pacientes. La Oficina Nacional de Estadística (ONS) del Reino Unido ha llevado a cabo la Encuesta de Infección por Coronavirus [12]. A fecha de 1 de julio de 2021, la ONS ha estimado que 962.000 personas en Reino Unido tenían síntomas durante más de 4 semanas tras la infección y que no se explicaban por ninguna otra enfermedad. Los síntomas auto-reportados afectaban a las actividades de la vida diaria a 634.000 personas. En una sub-muestra adicional de 20.000 participantes del estudio con confirmación positiva por PCR, un 13,7% tenían síntomas con una duración superior a las 12 semanas y su prevalencia era mayor en mujeres (14,7% vs 12,7%) [12].

Los síntomas post-COVID-19 se han descrito con independencia de la gravedad de la fase aguda y en pacientes con formas leves de la infección. Una proporción de pacientes con COVID-19 prolongado no fueron hospitalizados ni tuvieron COVID-19 grave. Huang et al [11] han estudiado las historias clínicas de 178.971 pacientes de California que tuvieron la infección por el virus SARS-CoV-2 confirmado por PCR e identificaron un total de 1.407 pacientes que no fueron hospitalizados previamente pero que padecieron síntomas nuevos compatibles con COVID-19 “persistente”. Los síntomas más frecuentes fueron palpitations, rinitis, disgeusia, insomnio, hiperhidrosis, ansiedad, dolor de garganta y cefalea. El 72% eran mujeres, y un 27% relataba síntomas persistentes de más de 60 días de evolución. Un 32% fueron asintomáticos en el momento de realizar una prueba diagnóstica para el SARS-CoV-2 en la fase aguda.

El estudio REACT-2 (del inglés: *Real-time Assessment of Community Transmission-2*) es un estudio de base comunitaria realizado en Inglaterra que ha evaluado la prevalencia de 29 síntomas persistentes post-COVID-19 en la población (508.707 sujetos). La prevalencia de COVID-19 auto-reportado fue del 19,2% (76.155 casos); un 37,7% refirió tener uno o más síntomas persistentes durante más de 12 semanas. En este estudio, tan solo una tercera parte de los sujetos con síntomas persistentes a las 12 semanas había padecido COVID-19 grave [13].

### **3.1. ESTUDIOS DE META-ANÁLISIS Y REVISIONES SISTEMÁTICAS**

Diversos estudios de meta-análisis y revisiones sistemáticas han analizado la prevalencia de los síntomas post-COVID-19. Uno de los problemas metodológicos de este tipo de estudios es que los estudios analizados incluyen pacientes con un intervalo de tiempo de seguimiento muy variable, de semanas a meses, y no es posible distinguir aquellos pacientes que padecen secuelas de múltiples órganos de aquellos que tienen síntomas de inicio reciente.

Salamanna y cols han analizado 145 artículos sobre síntomas post-COVID. El 55% de los estudios analizaban síntomas específicos sistémicos, un 24,1% síntomas neurológicos y disfunción olfativa, y un 20,7% síntomas relacionados con una función pulmonar alterada [2].

Una revisión sistemática de 45 estudios ha analizado la frecuencia de 84 signos o síntomas persistentes tras padecer COVID-19 en 9.751 pacientes (54% varones). La presencia de al menos un síntoma persistente se describió en el 72,5% de los sujetos, y los síntomas individuales más comunes fueron disnea (36%), fatiga (40%), y trastornos del sueño/insomnio (29,4%) [18].

Otra reciente revisión sistemática de 15 estudios con un total de 47.910 pacientes ha analizado la prevalencia de 55 síntomas específicos tras padecer COVID-19. El intervalo de edad de los sujetos incluidos oscilaba entre los 18 y los 87 años, y el tiempo de seguimiento entre 14 y 110 días. El 80% de los sujetos presentaba uno o más síntomas, y los más comunes fueron fatiga (58%), cefalea (44%), trastornos de la atención (27%), alopecia (25%) y disnea (24%). Otros síntomas neurológicos frecuentemente observados fueron ageusia (23%), anosmia (21%), quejas de memoria (16%), y acúfenos (15%) [19].

### **3.2. ESTUDIOS DESCRIPTIVOS SOBRE SINTOMAS POST-COVID-19**

Los datos iniciales sobre prevalencia de síntomas post-COVID-19 proceden con frecuencia de series de pacientes que fueron ingresados con COVID-19. Así, el 87% de los pacientes hospitalizados por COVID-19 continúan presentando síntomas 60 días tras el inicio de la enfermedad [20]. En cambio, las estimaciones en sujetos no hospitalizados varían del 27% [11] al 85% [21]. En la literatura se han publicado varios artículos que han descrito la frecuencia de síntomas a los 2, 4, 6 y 8 meses tras padecer la infección por SARS-CoV-2.

Diversos estudios de pacientes con COVID-19 leve y grave han descrito síntomas persistentes, tanto de naturaleza sistémica (fatiga, disnea) como neurológica, cognitiva o psiquiátrica [22-32]. Los principales síntomas neurológicos post-COVID-19 descritos son cefalea, anosmia, ageusia, parestesias, mialgias, trastornos del sueño, quejas cognitivas (problemas de memoria, atención y concentración), además de síntomas psiquiátricos (trastornos de ansiedad, depresión, trastorno de estrés post-traumático). La astenia y la fatiga son síntomas frecuentes, de origen multifactorial, pero que también pueden tener un origen musculoesquelético o neurológico.

Numerosos pacientes que padecieron “COVID-19 persistente” y que no fueron hospitalizados, presentan después fatiga y “niebla mental” que afectan a su función cognitiva y a su calidad de vida. En un estudio prospectivo que analizó los primeros 100 pacientes con COVID-19 “persistente” tratados en una clínica de Neuro-COVID en Estados Unidos (edad media 43 años, 70% mujeres), y que no habían sido hospitalizados previamente, los síntomas neurológicos más comunes y de más de 6 semanas de duración fueron: “niebla mental” (81%), cefalea (68%), parestesias (adormecimiento, hormigueo; 60%), disgeusia (59%), anosmia (55%), y mialgias (55%); y el 85% relataba fatiga [21]. Las comorbidades más frecuentemente observadas fueron ansiedad-depresión (42%) y enfermedad autoinmunes (16%). Un 64% de los pacientes se recuperó en promedio a los cinco meses, pero un porcentaje de pacientes continuó presentando síntomas durante más de 9 meses después.

En un estudio realizado en España con 274 pacientes con síntomas post-COVID, la presencia de algún síntoma neurológico a las 10-14 semanas de padecer COVID-19 fue del 12% [28]. Carvalho-Schneider y cols [22] evaluaron 150 sujetos que habían padecido COVID-19 leve a los dos meses y dos terceras partes relataban algún síntoma, siendo los frecuentes astenia y fatiga (40%), disnea (30%) y anosmia/ageusia (23%). En un estudio longitudinal que reclutó consecutivamente pacientes con

confirmación mediante PCR, el 53% de los 180 sujetos no hospitalizados con COVID-19 tenían al menos un síntoma persistente durante una media de 4 meses [14].

### **3.2.1. Estudios casos-control**

Los datos sobre la frecuencia de síntomas específicos más relevantes, sean de naturaleza neurológica o sistémica, y su pronóstico proceden de estudios casos-control.

En un estudio prospectivo de 606 pacientes con COVID-19 que padecieron nuevos síntomas neurológicos durante el ingreso hospitalario, 395 supervivientes se compararon con un grupo control de pacientes COVID-19 que no padecieron sintomatología neurológica. Así, 196 pacientes neurológicos y 186 controles completaron el seguimiento a los seis meses. Los pacientes con complicaciones neurológicas tenían mayor dependencia funcional a los seis meses y una probabilidad menor de regresar al trabajo que el grupo control [33].

El estudio COMMUNITY realizado en Estocolmo ha recopilado la presencia de síntomas post-COVID en trabajadores de la salud a los meses 2, 4, y 8 tras padecer COVID-19 leve. En este estudio se comparó la frecuencia de síntomas en 323 pacientes seropositivos frente a un grupo control de 1.072 sujetos seronegativos que habían registrado prospectivamente sus síntomas en una aplicación digital. El 26% (frente a un 9% en el grupo control) relataba un síntoma funcional al menos 2 meses tras padecer COVID-19 y un 15% a los 8 meses (2% en el grupo control). Los síntomas neurológicos más frecuentes a los 8 meses fueron anosmia (9% vs 0,1%), fatiga (4% vs 1,5%), ageusia (3,7% vs 0,1%), trastornos del sueño (2,2% vs 0,8%), cefalea (1,5% vs 1%), mialgias (0,6% vs 0,4%), problemas de concentración (0,6% vs 0,2%) y quejas de memoria (0,3% vs 0,2%). La anosmia persistió más de 2 meses en el 14,6%, y en un 10,8% a los 4 meses [27].

### **3.2.2. Síntomas neurológicos comunes – estudios específicos**

La cefalea se describe como un síntoma neurológico común en algunos estudios. Así el estudio COVERSAN que evaluó una cohorte prospectiva de 201 pacientes afectados de COVID-19 leve, con una edad media de 45 años y en el que una tercera parte de los participantes eran trabajadores sanitarios, encuentra una prevalencia de cefalea a los cuatro meses del 83%, mialgias en el 87% y fatiga en el 98% [24].

La presencia de cefalea en la fase aguda de la infección por SARS-CoV-2 se asocia con una prevalencia mayor de cefalea y fatiga y otros síntomas crónicos post-COVID-19. En un estudio de casos y controles, 205 pacientes con cefalea y 410 pacientes sin cefalea se evaluaron a los 7 meses del alta hospitalaria mediante una entrevista telefónica. La cefalea en la fase aguda se asoció con una historia previa de migraña y con la aparición de cefalea persistente de tipo tensional [34].

Los síntomas de anosmia y ageusia característicos de la fase aguda pueden persistir en la fase crónica, como muestra un estudio prospectivo multicéntrico de 138 pacientes con COVID-19 evaluados a los dos meses, en el que 5,8% tenía disfunción olfativa moderada-grave y el 4,3% disgeusia [35]. En otro estudio prospectivo de 183 pacientes afectados de COVID-19 sintomático leve, el 18,6% presentaba alteración del sentido del gusto o del olfato a los dos meses [36]. La prevalencia de disfunción olfatoria evaluada mediante el Test Breve de Identificación del Olor, los tres meses de padecer COVID-19 leve, se ha estimado en un 14,3% [37]. La disminución del olfato (hiposmia) durante más de seis meses se ha descrito en un 15% [38].

También son frecuentes las quejas auditivas y los síntomas vestibulares y del equilibrio. En un estudio retrospectivo de 48 pacientes que habían tenido COVID-19 leve, un 8,3% relataba pérdida de audición al mes de seguimiento, un 4,2% acúfenos, el 8,3% sensación de mareo, un 2% vértigo rotatorio, un 2% desequilibrio dinámico y el 6,3% trastornos del equilibrio estático [39].

Los síntomas cognitivos son más graves y más frecuentes en pacientes que necesitaron ingreso hospitalario, aunque los porcentajes varían de nuevo según los estudios. Un estudio italiano describe quejas cognitivas entre uno y tres meses en el 17% de los 105 pacientes dados de alta tras sufrir neumonía por COVID-19[26]. Garriges y cols [25] evaluaron 120 pacientes, que habían sido ingresados en una unidad COVID-19; a los tres meses, un 55% padecía fatiga, un 34% relataba problemas de memoria y un 28% dificultades de concentración. Halpin y cols [26] compararon la prevalencia de síntomas post-COVID-19 en pacientes ingresados en UCI y en pacientes ingresados en planta; los trastornos de la atención y de la memoria eran más frecuentes en aquellos que precisaron ingreso en UCI (52% vs 33,8%). Los síntomas cognitivos persisten todavía a los cuatro meses del alta. Así, en el estudio COMEBAC francés realizado mediante una encuesta telefónica, el 21% de los sujetos relataba la presencia de problemas cognitivos nuevos [31] a los cuatro meses del alta; sin embargo la presencia de alteraciones cognitivas se detectó en el 38% de los 174 pacientes que fueron evaluados presencialmente.

Los trastornos del sueño se han descrito con una frecuencia variable. En un estudio de 119 pacientes que fueron ingresados por neumonía COVID-19, el 57% tenía trastornos del sueño a los 2 meses del alta [23]. El 31% de los pacientes ingresados en una unidad COVID-19 relataba trastornos del sueño a los tres meses [25]. Sin embargo existen diferencias notables en la frecuencia de los problemas del sueño, y así un estudio longitudinal realizado en Wuhan, China, con 538 sujetos encuentra que la prevalencia de trastornos del sueño a los tres meses del alta fue del 18% [32].

### **3.3. CONJUNTOS O AGREGADOS DE SINTOMAS**

En el estudio REACT-2, un 14,8% de los sujetos refirió padecer al menos tres síntomas durante más de 12 semanas [13]. En este estudio se describen dos conjuntos de síntomas diferentes que persisten más de tres meses: 1) fatiga asociada a dolor muscular, trastornos del sueño y disnea, (n=15.799), síntomas que eran más prominentes en pacientes con historia de COVID-19 leve; 2) síntomas respiratorios con fatiga y dolor torácico, (n=4.441), que eran más frecuentes en pacientes con antecedentes de COVID-19 grave. La prevalencia de muchos síntomas neurológicos fue mayor en los pacientes en los que predominaba el agregado de síntomas respiratorios: cefalea (15,3% vs 13,9%), mialgias (23,7% vs 16,7%), parestesias (7,9% vs 5,1%), disfonía (9,1% vs 5%), mareos/vértigo (12,3% vs 7,5%), debilidad en extremidades (12,5% vs 7,7%); la excepción era la pérdida del olfato (9,6% vs 15,5%) y del gusto (9,3% vs 12,5%), síntomas que eran más comunes en el agregado de síntomas en el que predominaba la fatiga [13]. La sensibilidad de este patrón de síntomas debe ser evaluado en estudios prospectivos.

Sudre y cols [40] han identificado dos patrones de síntomas a los 28 días post-COVID: el primero cursa con fatiga, cefalea, disnea, tos persistente y anosmia; en cambio el segundo grupo de



pacientes tenía síntomas multisistémicos, gastrointestinales y fiebre. Huang y cols [11] describen la presencia de cinco agregados de síntomas específicos de una duración mayor de 60 días: tos-dolor torácico, tos-disnea, ansiedad-taquicardia, dolor abdominal-nauseas, dolor lumbar-dolor articular. En el estudio COVERSAN, el 42% de los individuos estudiados relataba 10 o más síntomas a los 4 meses [24].

### **3.4. FACTORES DE RIESGO**

En la Encuesta de Infección por Coronavirus británica, la prevalencia de síntomas post-COVID-19 fue mayor en los grupos de edad de 35 a 69 años, en mujeres y en aquellas personas que vivían en áreas más deprimidas socio-económicamente o que tenían otra comorbilidad o discapacidad previa [12].

Los pacientes que presentan síntomas persistentes en el tiempo es más probable que sean del sexo femenino, tengan una edad media, y además presenten síntomas de ansiedad y depresión con una frecuencia mayor (42%) previo a padecer COVID-19. En el estudio REACT-2 se ha descrito una prevalencia mayor en personas con bajo nivel socioeconómico (51% vs 29%) y que viven en áreas más deprimidas. La persistencia de síntomas durante más de 12 semanas fue mayor en mujeres (OR: 1,51; IC 95%: 1,46-1,55) y su prevalencia aumentaba con la edad con un aumento lineal de un 3,5% por década de vida [13]. Sin embargo, otros estudios sugieren una prevalencia mayor en sujetos de edad media [12]. Una vez ajustado por edad y sexo, los síntomas persistentes se asociaban también con sobrepeso y obesidad, hábito tabáquico e historia previa de hospitalización por COVID-19.

Los síntomas persistentes post-COVID-19 se asocian con la gravedad de la COVID-19 en la fase aguda; así se ha descrito una prevalencia mayor de síntomas persistentes entre personas que fueron hospitalizadas por COVID-19 [20, 41]. El número de síntomas en la fase aguda (padecer más de cinco síntomas en la primera semana; odds ratio 3,53; IC 95%: 2,76-4,5), la edad (18% en el grupo de edad 18-49 versus 22% en mayores de 70 años), y el sexo (mujer) se han asociado con un riesgo mayor de padecer síntomas crónicos tras COVID-19 en el Estudio de Síntomas COVID realizado con la aplicación "Zoe" [40].

#### 4. FISIOPATOLOGIA

En la fecha de escribir este manuscrito (julio del 2021), ya transcurrido un año y medio de pandemia, se ha acumulado una ingente cantidad de información clínica relacionada con la infección por el virus SARS-CoV-2. De este modo, se han perfilado las principales manifestaciones neurológicas que complican la infección reciente y que involucran tanto al sistema nervioso central como al periférico, aparecen precozmente o de forma tardía, y se dividen en cuanto al pronóstico en leves o graves. Así, durante la fase aguda de la infección podemos incluir entre las más frecuentes pero menos graves la anosmia, cefalea, mialgias e inestabilidad-mareo inespecífico [42-45]. En contraste, las más graves incluyen pero menos frecuentes incluyen encefalopatía, síncope, crisis epilépticas e ictus [42-45]. Se han descrito otras complicaciones neurológicas posteriores en pacientes individuales o series cortas de pacientes que incluyen el síndrome de Guillain-Barré y sus variantes, la encefalomiелitis aguda diseminada y la afección de pares craneales, entre otras [42, 46]. Finalmente, pueden aparecer alteraciones más tardías y descritas en la sección anterior, y que aparecen entre un 20 y un 70% de los casos en series inglesas y de Alemania [47].

Esta abundante información clínica contrasta con la relativa escasez de información en cuanto a los mecanismos lesionales, en parte debido a la escasez de información básica, de modelos animales, etc., lo cual hace que la etiopatogenia de las manifestaciones neurológicas no se conozca con certeza. Sin embargo, disponemos de información de otros virus similares, y progresivamente de información proveniente de series de autopsias, etc., que nos arrojan luz sobre los mecanismos operativos en la disfunción neurológica. Avanzar en dichos conocimientos nos permitirá abordar el tratamiento de estos pacientes de una forma racional y efectiva, quizá personalizada, que mejore su pronóstico a corto y largo plazo, ayudando a prevenir secuelas.

En este apartado revisaremos en primer lugar los mecanismos de invasión y de daño neurológico en la fase aguda y en las manifestaciones post-infecciosas, y posteriormente los relacionados con la COVID persistente.

##### 4.1. ¿El virus tiene acceso al Sistema Nervioso Central (SNC)?

Existen varias vías potenciales por las que el SARS-CoV-2 puede invadir el SNC. En primer lugar, hay que recordar que el virus, cebado por la proteína de membrana TMPRSS2 se une a su receptor (el enzima conversor de la angiotensina 2 – ECA-2) mediante la proteína S (*spike*) para poder penetrar en las diferentes células [48]. En el Sistema Nervioso dicho receptor se encuentra fundamentalmente en la vasculatura cerebral y en el epitelio olfatorio, y de forma mucho menos prominente en determinadas células nerviosas parenquimatosas [49].

Existe controversia en cuanto al grado de evidencia de las rutas de invasión del SNC por parte del virus, que exponemos a continuación.

a) Vía olfatoria

La transmisión aérea del virus facilita su acceso al epitelio de la mucosa olfatoria que contiene receptores ECA-2, y de ahí aprovechando la vecindad del tejido neural olfatorio puede penetrar en las terminaciones nerviosas atravesando la placa cribiforme y siguiendo la ruta axonal del tracto olfatorio hasta alcanzar áreas de la corteza cerebral y centros de control respiratorio y cardiovascular en el tronco cerebral [50].

b) Vía hematológica

La vía hematológica es otra opción, y de hecho la importante liberación de mediadores inflamatorios, citocinas incluidas, que ocurre en fases agudas de esta infección puede conducir a un aumento de la permeabilidad de la barrera hematoencefálica (BHE) que facilite el acceso viral al cerebro [51]. Los órganos circumventriculares, situados alrededor del III y IV ventrículos y carentes de BHE, podrían constituir otra fuente de entrada, al igual que los plexos coroideos, que parece sufrir una infección por SARS-CoV-2 de forma consistente, representando por tanto una vía de acceso al SNC [52].

Los pericitos, que son las células que enlazan el endotelio con la astrogliá, también se infectan con el SARS-CoV-2, y podrían constituir un lugar de replicación viral que facilitara la invasión del sistema nervioso y su diseminación a los astrocitos contiguos y de ahí a otras células parenquimatosas [53].

c) Vía digestiva

Algunos estudios han señalado la posibilidad de que el SARS-CoV-2 llegue al sistema nervioso a través de la infección del aparato digestivo (ECA-2 está presente en los enterocitos[46] desde donde accedería a las terminales del nervio vago viajando de modo axonal retrógrado hasta el tronco cerebral; tanto el núcleo del tracto solitario como el dorsal del vago parecen expresar los receptores ECA-2 (revisado en [54]).

#### **4.2 ¿El daño es directo o indirecto?**

La primera pregunta que surge en relación con la afección neurológica en la COVID-19 es si la lesión está causada por la infección directa del virus en las estructuras nerviosas o existen mecanismos secundarios de daño indirecto desencadenados por la infección viral.

a) Daño directo

La evidencia actual es que el daño directo viral no es un fenómeno prominente o principal. En primer lugar, la búsqueda de material genético viral mediante PCR en el líquido cefalorraquídeo de los pacientes con alteraciones neurológicas ha sido negativa salvo en contadas excepciones. El análisis del material genético proveniente de corteza frontal de pacientes fallecidos con COVID-19 y controles demuestra la ausencia del virus en el cerebro, pero sin embargo encuentra alteraciones celulares del parénquima cerebral que indican que los plexos coroideos detectan la inflamación periférica y la vehiculizan al cerebro, observando una infiltración por linfocitos T. Se aprecian cambios en la microglia y la astrogliosis similares a los que se encuentran en diversas enfermedades neurodegenerativas y alteraciones de la transmisión sináptica en neuronas con funciones cognitivas, lo que podría explicar parte de la disfunción neurológica en esta infección [53].

Segundo, en la inmensa mayoría de LCR analizados no había datos inflamatorios (pleocitosis, aumento de proteínas, etc).

En tercer lugar, los estudios de RM cerebral en su mayoría han sido normales o inespecíficos, sin hallazgos sugestivos de una encefalitis viral, si bien en algunos casos se han encontrado alteraciones en la corteza olfatoria en pacientes con anosmia [55], datos de encefalomiелitis aguda diseminada [56] o lesiones citotóxicas del cuerpo calloso [57] y que pueden aparecer en otro tipo de meningoencefalitis [58]. También se ha descrito captación leptomeníngea [59] y alteraciones corticales inespecíficas [60] en pacientes ingresados en la UCI. La RM post-mortem tampoco demostró cambios encefalíticos [61].

Finalmente, los estudios anatomopatológicos en autopsias no muestran datos de encefalitis en su mayoría, observando cambios secundarios a la hipoxia y la isquemia cerebral principalmente. En un estudio sobre 43 cerebros de autopsias de pacientes fallecidos por la COVID-19, Matschke et al. observan cambios neuropatológicos leves, destacando la inflamación del tronco cerebral, pero sin evidencia de daño directo por el coronavirus, observando la presencia de proteína viral en el endotelio vascular, pero no en las neuronas o la glía [59]. Otro estudio que analizó el material genético proveniente de corteza frontal de pacientes fallecidos con COVID-19 y controles demostró la ausencia del virus en el cerebro [62].

En algunos casos, sin embargo, se han detectado partículas virales o genoma viral en el SNC. La presencia de virus en el SNC da lugar a una respuesta local de la microglía mediada por el HLA-DR+; esta respuesta se correlaciona con la presencia de mediadores inflamatorios en el LCR [50].

#### b) Daño indirecto

La ausencia de un daño directo prominente obliga a reflexionar sobre el papel de los mecanismos indirectos en esta infección, que pueden ser múltiples y complejos.

Así, sabemos que la hipoxia consecuente al fallo respiratorio condiciona un daño en las áreas cerebrales más sensibles, como el hipocampo o el cerebelo, entre otros. La entrada de virus en las células endoteliales del SNC dan lugar a la activación de neutrófilos, macrófagos, producción de trombina, y activación del complemento, facilitando el depósito de trombos, un fenómeno muy consistente con los infartos cerebrales asociados a la COVID-19 (revisado en [51]).

Por otro lado, existe una evidencia creciente de la liberación de citocinas en pacientes con COVID-19, que puede dar lugar a un síndrome de liberación de citocinas e incluso a una auténtica tormenta de citocinas [63]. Estas entidades consisten en síndromes inflamatorios sistémicos con importante liberación de mediadores inflamatorios y que se producen en relación con el uso de fármacos, infecciones, neoplasias, y patologías autoinmunes o de origen genético. La COVID-19 ha renovado el interés en estos fenómenos inflamatorios, a veces difíciles de distinguir de una respuesta inflamatoria potente y que en ocasiones pueden ser fatales. En la COVID-19 existe una importante liberación de citocinas y mediadores inflamatorios que incluyen interleucina (IL) 1 beta, IL-2, IL-4, IL-6, IL-10, IL-12, CXCL8 y CXCL10, interferón gamma, proteína inflamatoria macrofágica, factor de crecimiento endotelial vascular (VEGF), y factor de necrosis tumoral (TNF) alfa, entre otros [64, 65]. Un estudio sugiere que el perfil de citocinas en suero y LCR se asocia con diferentes manifestaciones [64]. Por ejemplo, la encefalopatía se asoció a incrementos de IL-6 sérica, un predictor de mal pronóstico. La IL-2 estaba elevada en el LCR de estos pacientes. De este modo, la encefalopatía parece tener un origen multifactorial, que incluyen procesos mediados inmunológicamente. Los síndromes parainfecciosos relacionados con la COVID-19, sin embargo se asociaron a elevaciones de IL-6, CXCL8, y CXCL10 en el suero de los pacientes [64].

La liberación de estas sustancias proinflamatorias produce un aumento de la permeabilidad de la BHE que a su vez facilita el paso de citocinas al SNC dando lugar a la activación de la microglía y de los astrocitos. La microglía activada libera otros mediadores inflamatorios que incluyen otras interleucinas, factores del complemento, TNF-alfa, glutamato, y ácido quinolínico. Como consecuencia, se produce un aumento del glutamato con expresión excesiva de los receptores de NMDA, dando lugar a excitotoxicidad y pérdida neuronal, lo cual puede conducir a trastornos de la memoria, dificultad de aprendizaje, alucinaciones o alteraciones de la neuroplasticidad. De hecho, los cambios en la microglia y la astrogliosis son similares a los que se encuentran en diversas enfermedades neurodegenerativas y alteraciones de la transmisión sináptica en neuronas con funciones cognitivas, lo que podría explicar parte de la disfunción neurológica en esta infección [53]. En un estudio en 8 pacientes con encefalopatía COVID-19 se observó la presencia de

anticuerpos frente al SARS-CoV-2 en el LCR demostrándose síntesis intratecal o rotura de la barrera hematoencefálica, la cual a su vez podría permitir la entrada de citoquinas y mediadores inflamatorios en el sistema nervioso, facilitando también los mecanismos de neuroinflamación y neurodegeneración [66]. La liberación de citocinas también ha sido implicada en la génesis de la cefalea en la COVID-19, que conduciría a una activación de las neuronas nociceptivas.

### **4.3. Daño neurológico post-infeccioso**

En una forma similar a otras infecciones virales, la infección por SARS-CoV-2 se ha asociado a una variedad de complicaciones neurológicas que aparecen de forma tardía y que probablemente están mediadas por mecanismos inmunológicos. Estas manifestaciones afectan al Sistema Nervioso Central y Periférico, e incluyen fundamentalmente la encefalomielitis aguda diseminada y el síndrome de Guillain-Barré y sus variantes. En estos casos, no se detecta la presencia de virus en el LCR de los pacientes, lo cual apoya la hipótesis de mecanismos inmuno-mediados, post infecciosos más que la infección viral directa. En este sentido, se han detectado anticuerpos frente a gangliósidos en algunos pacientes con afectación del SNP tras la COVID, que podrían estar provocados por una reacción cruzada frente a glicoproteínas de la espícula (*spike*) viral [67].

### **4.4. COVID persistente**

Los síntomas de la COVID persistente pueden estar presentes entre un 30 y un 80% de los pacientes según diversas series [20, 41, 68] y parece existir una asociación entre la gravedad de la enfermedad pulmonar aguda y la presencia de síntomas persistentes, más marcada en mujeres [11].

En una serie de 120 trabajadores sanitarios que pasaron una COVID-19 de gravedad moderada 4 meses antes, no hubo diferencias en las pruebas de evaluación cognitiva practicadas con respecto a una población control que no había pasado la COVID-19 [69]. El grado de estrés, ansiedad y depresión, sin embargo, sí fue superior entre los primeros. Por el contrario, y como muestra de la divergencia de resultados presentes en diferentes aspectos de esta infección, Woo et al. encontraron un déficit cognitivo moderado en 14 de 18 pacientes jóvenes que habían pasado la COVID-19 una mediana de 85 días antes en comparación con 10 sujetos sanos [47].

Los mecanismos operativos en esta fase son aún menos conocidos que los de la fase aguda y de probable origen multifactorial, incluyendo los posibles efectos directos de la infección viral, la respuesta inmune y la inflamación sistémica, la alteración de los neurotransmisores, el tratamiento con corticoides, la estancia en la UCI, y el aislamiento social, entre otros [68]. 2020). Aunque el perfil

de citocinas séricas en la fase aguda se conoce y se relaciona con el pronóstico, existe menos información en esta fase de la infección [70].

Por otro lado, hay evidencia de una disfunción del sistema nervioso autónomo en la COVID-19. Los síntomas presentes en pacientes con “COVID-19 persistente” incluyen palpitaciones, síntomas digestivos, hipotensión ortostática, y síndrome de taquicardia postural ortostática (STPO), entre otros [71]. Una hipótesis sugiere que la entrada del virus o de moléculas pro-inflamatorias a través de los órganos circumventriculares y el área postrema podría afectar a centros de control autonómico localizados en el tronco cerebral y que regulan la presión arterial o la respiración. Además, la tormenta de citocinas en la COVID-19 en parte es consecuencia de la activación del sistema simpático, mientras que la activación del parasimpático podría tener consecuencias anti-inflamatorias, abriendo una puerta a la terapia de estos pacientes. Se postula también la existencia de autoanticuerpos frente a receptores autonómicos y desencadenados por la infección viral, tal y como se ha descrito en el STPO [72].

La disfunción metabólica de diversas redes neuronales como consecuencia de los mecanismos de daño directo e indirecto pueden contribuir los síntomas de estos pacientes. Así, un estudio de metabolismo cerebral mediante tomografía por emisión de positrones (PET) en 35 pacientes con quejas persistentes durante más de 3 semanas mostró un hipometabolismo en la región olfatoria y sus conexiones en el lóbulo temporal (hipocampo y amígdala), el tronco cerebral y el cerebelo [73]. Las quejas incluían fatiga, alteración del olfato, dificultades de memoria, dolor e insomnio. Otro estudio en dos pacientes con COVID persistente y quejas de niebla mental mostró un hipometabolismo del giro del cíngulo, que está implicado en las emociones, memoria, depresión, y toma de decisiones y así su disfunción puede contribuir a los síntomas de estos pacientes [74]. Otro estudio en 4 pacientes mayores de 60 años con quejas cognitivas o crisis de aparición en las 2 semanas siguientes al inicio de la COVID-19 encontró una alteración en el metabolismo frontal y cerebeloso [75]. El cuadro clínico mejoró con inmunoterapia (inmunoglobulinas IV o pulsos de corticoides), por lo que los autores proponen un mecanismo inmunológico, dado que además, el LCR era normal, incluyendo la negatividad de la PCR viral. Sin embargo, no había grupo control, y por otro lado, el hipometabolismo podría ser consecuencia de otros factores como la depresión. Es interesante reseñar que en 2 pacientes a quienes se les practicó una punción lumbar con estudio de marcadores se observó un descenso de los valores de beta-amiloide 1-42, similar a lo que aparece en la enfermedad de Alzheimer [75].

Un estudio longitudinal en 7 pacientes con encefalopatía aguda y COVID19 mediante PET-TAC seriados con 18 fluoro-deoxiglucosa mostró un patrón de hipometabolismo en una extensa red cerebral que incluía la corteza frontal, el cíngulo anterior, la ínsula y el núcleo caudado [76]. Los

pacientes tuvieron fundamentalmente síntomas cognitivos y de comportamiento frontal. Su RM craneal era normal. A los 6 meses los pacientes habían mejorado clínicamente, aunque persistían trastornos cognitivos y emocionales, y la PET seguía mostrando alteraciones en las estructuras mencionadas. Esta disfunción funcional contribuye con alta probabilidad a la persistencia de síntomas cognitivos en los pacientes que han padecido COVID-19, particularmente si fue grave y presentaron encefalopatía.

La fatiga, definida como una disminución del rendimiento físico y mental puede depender de una variedad de factores psicológicos (ansiedad, depresión, alteración del sueño), centrales (alteración de la neurotransmisión, inflamación) y periféricos (alteración funcional o estructural muscular) [77], pero su contribución queda por ser demostrada, al igual que las hipótesis de una reacción autoinmune o un reservorio viral, entre otras.

En algunos casos, y tanto en pacientes con COVID-19 como después de la vacunación se ha establecido un diagnóstico de trastorno neurológico funcional en presencia de unos síntomas muy sugestivos y que incluían movimientos anormales irregulares y alteraciones de la marcha, entre otros, sin evidencia de una disfunción neurológica subyacente [78-80]. Constituye una condición compleja, que suscita recelo en los pacientes y que requiere un abordaje directo que explique la situación y que aclare que no se trata de una simulación[81].

## **5. CONCLUSIONES**

Los estudios de base comunitaria es más probable que sean más representativos del rango de gravedad de la enfermedad en la población en comparación con los registros de origen hospitalario. Existe un gran espectro de síntomas y manifestaciones clínicas post-COVID-19, y los estudios basados en síntomas auto-reportados incluyen síntomas comunes y no específicos, por lo que pueden haber sobreestimado la prevalencia de síntomas persistentes.

Numerosos síntomas sistémicos, neurológicos y cognitivos afectan a una elevada proporción de personas que padecieron COVID-19 durante semanas o meses. Un gran número tiene síntomas crónicos que requieren cuidados y tratamiento rehabilitador. La incapacidad para retornar al trabajo y la discapacidad asociada al síndrome post-COVID tiene un gran impacto desde una perspectiva socio sanitario.

Los mecanismos operativos que justifican estos trastornos, aunque no bien conocidos, son de probable origen multifactorial, incluyendo una respuesta inflamatoria excesiva, una disfunción de redes neuronales, una alteración de neurotransmisores, el daño viral persistente, y cuadros de



origen funcional, entre otros. La investigación en progreso nos indicará la mejor forma de abordar el manejo de estos complejos pacientes.

## 6. REFERENCIAS

1. Anónimo. *Coronavirus disease (COVID-19) Pandemic*. Geneva: World Health Organization, 2021. Available from: <https://www.who.int/emergencies/diseases/novel-coronavirus-2019>.
2. Salamanna, F., F. Veronesi, L. Martini, M.P. Landini, and M. Fini, *Post-COVID-19 Syndrome: The Persistent Symptoms at the Post-viral Stage of the Disease. A Systematic Review of the Current Data*. Front Med (Lausanne), 2021. **8**: p. 653516.
3. Matías-Guiu, J., U. Gomez-Pinedo, P. Montero-Escribano, P. Gomez-Iglesias, J. Porta-Etessam, and J.A. Matias-Guiu, *Should we expect neurological symptoms in the SARS-CoV-2 epidemic?* Neurologia (Engl Ed), 2020. **35**(3): p. 170-175.
4. Serrano-Castro, P.J., G. Estivill-Torrús, P. Cabezudo-García, J.A. Reyes-Bueno, N. Ciano Petersen, M.J. Aguilar-Castillo, et al., *Impact of SARS-CoV-2 infection on neurodegenerative and neuropsychiatric diseases: a delayed pandemic?* Neurologia (Engl Ed), 2020. **35**(4): p. 245-251.
5. Carod-Artal, F.J., O. Wichmann, J. Farrar, and J. Gascon, *Neurological complications of dengue virus infection*. Lancet Neurol, 2013. **12**(9): p. 906-919.
6. Garcia-Monco, J.C. and J.L. Benach, *Lyme Neuroborreliosis: Clinical Outcomes, Controversy, Pathogenesis, and Polymicrobial Infections*. Ann Neurol, 2019. **85**(1): p. 21-31.
7. Tansey, C.M., M. Louie, M. Loeb, W.L. Gold, M.P. Muller, J. de Jager, et al., *One-year outcomes and health care utilization in survivors of severe acute respiratory syndrome*. Arch Intern Med, 2007. **167**(12): p. 1312-20.
8. Anónimo. *National Institute for Health and Care Excellence (NICE). COVID-19 rapid guideline: managing the long-term effects of COVID-19 (NG188)*. Available from: URL: <https://www.nice.org.uk/guidance/ng188> [23.06.2021].
9. Anónimo. *Centers for Disease Control and Prevention. Post-COVID Conditions*. Available from: <https://www.cdc.gov/coronavirus/2019-ncov/long-term-effects.html> [23.06.2021].
10. Carod-Artal, F.J., *Neurological complications of coronavirus and COVID-19*. Rev Neurol, 2020. **70**(9): p. 311-322.
11. Huang, Y., M.D. Pinto, J.L. Borelli, M.A. Mehrabadi, H. Abrihim, N. Dutt, et al., *COVID Symptoms, Symptom Clusters, and Predictors for Becoming a Long-Hauler: Looking for Clarity in the Haze of the Pandemic*. medRxiv, 2021. 10.1101/2021.03.03.21252086.
12. Ayoubkhani D and P. P. *Prevalence of ongoing symptoms following coronavirus (COVID-19) infection in the UK - Office for National Statistics*. Available from: <https://www.ons.gov.uk/peoplepopulationandcommunity/healthandsocialcare/conditionsanddiseases/bulletins/prevalenceofongoingsymptomsfollowingcoronaviruscovid19infectionintheuk/1july2021> (2021). [04.07.21].
13. Whitaker, M., J. Elliott, M. Chadeau-Hyam, S. Riley, A. Darzi, G. Cooke, et al., *Persistent symptoms following SARS-CoV-2 infection in a random community sample of 508,707 people*. medRxiv, 2021. 10.1101/2021.06.28.21259452: p. 2021.06.28.21259452.
14. Petersen, M.S., M.F. Kristiansen, K.D. Hanusson, M.E. Danielsen, A.S. B, S. Gaini, et al., *Long COVID in the Faroe Islands - a longitudinal study among non-hospitalized patients*. Clin Infect Dis, 2020. 10.1093/cid/ciaa1792.
15. Klein, H., K. Asseo, N. Karni, Y. Benjamini, R. Nir-Paz, M. Muszkat, et al., *Onset, duration and unresolved symptoms, including smell and taste changes, in mild COVID-19 infection: a cohort study in Israeli patients*. Clin Microbiol Infect, 2021. 10.1016/j.cmi.2021.02.008.

16. Augustin, M., P. Schommers, M. Stecher, F. Dewald, L. Gieselmann, H. Gruell, et al., *Post-COVID syndrome in non-hospitalised patients with COVID-19: a longitudinal prospective cohort study*. *Lancet Reg Health Eur*, 2021. **6**: p. 100122.
17. Anónimo. *COVID Symptom Study. How Long Does COVID-19 Last?* . Available from: [https://covid19.joinzoe.com/post/covid-long-term?fbclid=IwAR1RxlcmmdL-EFjh\\_al](https://covid19.joinzoe.com/post/covid-long-term?fbclid=IwAR1RxlcmmdL-EFjh_al) [23.06.2021].
18. Nasserie, T., M. Hittle, and S.N. Goodman, *Assessment of the Frequency and Variety of Persistent Symptoms Among Patients With COVID-19: A Systematic Review*. *JAMA Netw Open*, 2021. **4**(5): p. e2111417.
19. Lopez-Leon, S., T. Wegman-Ostrosky, C. Perelman, R. Sepulveda, P. Rebolledo, A. Cuapio, et al., *More Than 50 Long-Term Effects of COVID-19: A Systematic Review and Meta-Analysis*. *Res Sq*, 2021. 10.21203/rs.3.rs-266574/v1.
20. Carfi, A., R. Bernabei, F. Landi, and C.-P.-A.C.S.G. Gemelli Against, *Persistent Symptoms in Patients After Acute COVID-19*. *JAMA*, 2020. **324**(6): p. 603-605.
21. Graham, E.L., J.R. Clark, Z.S. Orban, P.H. Lim, A.L. Szymanski, C. Taylor, et al., *Persistent neurologic symptoms and cognitive dysfunction in non-hospitalized Covid-19 "long haulers"*. *Ann Clin Transl Neurol*, 2021. **8**(5): p. 1073-1085.
22. Carvalho-Schneider, C., E. Laurent, A. Lemaigen, E. Beaufiles, C. Bourbao-Tournois, S. Laribi, et al., *Follow-up of adults with noncritical COVID-19 two months after symptom onset*. *Clin Microbiol Infect*, 2021. **27**(2): p. 258-263.
23. D'Cruz, R.F., M.D. Waller, F. Perrin, J. Periselneris, S. Norton, L.J. Smith, et al., *Chest radiography is a poor predictor of respiratory symptoms and functional impairment in survivors of severe COVID-19 pneumonia*. *ERJ Open Res*, 2021. **7**(1).
24. Dennis, A., M. Wamil, J. Alberts, J. Oben, D.J. Cuthbertson, D. Wootton, et al., *Multiorgan impairment in low-risk individuals with post-COVID-19 syndrome: a prospective, community-based study*. *BMJ Open*, 2021. **11**(3): p. e048391.
25. Garrigues, E., P. Janvier, Y. Kherabi, A. Le Bot, A. Hamon, H. Gouze, et al., *Post-discharge persistent symptoms and health-related quality of life after hospitalization for COVID-19*. *J Infect*, 2020. **81**(6): p. e4-e6.
26. Halpin, S.J., C. McIvor, G. Whyatt, A. Adams, O. Harvey, L. McLean, et al., *Postdischarge symptoms and rehabilitation needs in survivors of COVID-19 infection: A cross-sectional evaluation*. *J Med Virol*, 2021. **93**(2): p. 1013-1022.
27. Havervall, S., A. Rosell, M. Phillipson, S.M. Mangsbo, P. Nilsson, S. Hober, et al., *Symptoms and Functional Impairment Assessed 8 Months After Mild COVID-19 Among Health Care Workers*. *JAMA*, 2021. **325**(19): p. 2015-2016.
28. Moreno-Perez, O., E. Merino, J.M. Leon-Ramirez, M. Andres, J.M. Ramos, J. Arenas-Jimenez, et al., *Post-acute COVID-19 syndrome. Incidence and risk factors: A Mediterranean cohort study*. *J Infect*, 2021. **82**(3): p. 378-383.
29. Orru, G., D. Bertelloni, F. Diolaiuti, F. Mucci, M. Di Giuseppe, M. Biella, et al., *Long-COVID Syndrome? A Study on the Persistence of Neurological, Psychological and Physiological Symptoms*. *Healthcare (Basel)*, 2021. **9**(5).
30. Tomasoni, D., F. Bai, R. Castoldi, D. Barbanotti, C. Falcinella, G. Mule, et al., *Anxiety and depression symptoms after virological clearance of COVID-19: A cross-sectional study in Milan, Italy*. *J Med Virol*, 2021. **93**(2): p. 1175-1179.

31. Writing Committee for the, C.S.G., L. Morin, L. Savale, T. Pham, R. Colle, S. Figueiredo, et al., *Four-Month Clinical Status of a Cohort of Patients After Hospitalization for COVID-19*. JAMA, 2021. **325**(15): p. 1525-1534.
32. Xiong, Q., M. Xu, J. Li, Y. Liu, J. Zhang, Y. Xu, et al., *Clinical sequelae of COVID-19 survivors in Wuhan, China: a single-centre longitudinal study*. Clin Microbiol Infect, 2021. **27**(1): p. 89-95.
33. Frontera, J.A., D. Yang, A. Lewis, P. Patel, C. Medicherla, V. Arena, et al., *A prospective study of long-term outcomes among hospitalized COVID-19 patients with and without neurological complications*. J Neurol Sci, 2021. **426**: p. 117486.
34. Fernandez-de-Las-Penas, C., V. Gomez-Mayordomo, M.L. Cuadrado, D. Palacios-Cena, L.L. Florencio, A.L. Guerrero, et al., *The presence of headache at onset in SARS-CoV-2 infection is associated with long-term post-COVID headache and fatigue: A case-control study*. Cephalgia, 2021. 10.1177/03331024211020404: p. 3331024211020404.
35. Vaira, L.A., C. Hopkins, M. Petrocelli, J.R. Lechien, C.M. Chiesa-Estomba, G. Salzano, et al., *Smell and taste recovery in coronavirus disease 2019 patients: a 60-day objective and prospective study*. J Laryngol Otol, 2020. **134**(8): p. 703-709.
36. Boscolo-Rizzo, P., J. Polesel, G. Spinato, A. Menegaldo, C. Fabbris, L. Calvanese, et al., *Predominance of an altered sense of smell or taste among long-lasting symptoms in patients with mildly symptomatic COVID-19*. Rhinology, 2020. **58**(5): p. 524-525.
37. Ugurlu, B.N., O. Akdogan, Y.A. Yilmaz, D. Yapar, G. Aktar Ugurlu, H.S. Yerlikaya, et al., *Quantitative evaluation and progress of olfactory dysfunction in COVID-19*. Eur Arch Otorhinolaryngol, 2021. **278**(7): p. 2363-2369.
38. Pilotto, A., V. Cristillo, S.C. Piccinelli, N. Zoppi, G. Bonzi, D. Sattin, et al., *COVID-19 severity impacts on long-term neurological manifestation after hospitalisation*. medRxiv, 2021. 10.1101/2020.12.27.20248903: p. 2020.12.27.20248903.
39. Gallus, R., A. Melis, D. Rizzo, A. Piras, L.M. De Luca, P. Tramaloni, et al., *Audiovestibular symptoms and sequelae in COVID-19 patients*. J Vestib Res, 2021. 10.3233/VES-201505.
40. Sudre, C.H., B. Murray, T. Varsavsky, M.S. Graham, R.S. Penfold, R.C. Bowyer, et al., *Attributes and predictors of long COVID*. Nat Med, 2021. **27**(4): p. 626-631.
41. Arnold, D.T., F.W. Hamilton, A. Milne, A.J. Morley, J. Viner, M. Attwood, et al., *Patient outcomes after hospitalisation with COVID-19 and implications for follow-up: results from a prospective UK cohort*. Thorax, 2021. **76**(4): p. 399-401.
42. Garcia-Azorin, D., M.J.A. Abildua, M.E.E. Aguirre, S.F. Fernandez, J.C.G. Monco, C. Guijarro-Castro, et al., *Neurological presentations of COVID-19: Findings from the Spanish Society of Neurology neuroCOVID-19 registry*. J Neurol Sci, 2020. **423**: p. 117283.
43. Garcia-Monco, J.C., A. Cabrera Muras, M. Erburu Iriarte, P. Rodrigo Armenteros, A. Collía Fernández, J. Arranz-Martínez, et al., *Neurological Manifestations in a Prospective Unselected Series of Hospitalized COVID-19 patients*. Neurology: Clinical Practice, 2020. 10.1212/cpj.0000000000000913: p. 10.1212/CPJ.0000000000000913.
44. Garcia-Monco, J.C., A. Cabrera-Muras, A. Collia-Fernandez, M. Erburu-Iriarte, P. Rodrigo-Armenteros, I. Oyarzun-Irazu, et al., *Neurological reasons for consultation and hospitalization during the COVID-19 pandemic*. Neurol Sci, 2020. 10.1007/s10072-020-04714-w.
45. Romero-Sanchez, C.M., I. Diaz-Maroto, E. Fernandez-Diaz, A. Sanchez-Larsen, A. Layos-Romero, J. Garcia-Garcia, et al., *Neurologic manifestations in hospitalized patients with COVID-19: The ALBACOVID registry*. Neurology, 2020. **95**(8): p. e1060-e1070.

46. Cabrera Muras, A., M.D.M. Carmona-Abellan, A. Colliá Fernandez, J.M. Uterga Valiente, L. Anton Mendez, and J.C. Garcia-Monco, *Bilateral Facial Nerve Palsy associated with COVID-19 and Epstein-Barr Virus co-infection*. Eur J Neurol, 2020. 10.1111/ene.14561.
47. Woo, M.S., J. Malsy, J. Pottgen, S. Seddiq Zai, F. Ufer, A. Hadjilaou, et al., *Frequent neurocognitive deficits after recovery from mild COVID-19*. Brain Commun, 2020. **2**(2): p. fcaa205.
48. Hoffmann, M., H. Kleine-Weber, S. Schroeder, N. Kruger, T. Herrler, S. Erichsen, et al., *SARS-CoV-2 Cell Entry Depends on ACE2 and TMPRSS2 and Is Blocked by a Clinically Proven Protease Inhibitor*. Cell, 2020. 10.1016/j.cell.2020.02.052.
49. Hamming, I., W. Timens, M.L. Bulthuis, A.T. Lely, G. Navis, and H. van Goor, *Tissue distribution of ACE2 protein, the functional receptor for SARS coronavirus. A first step in understanding SARS pathogenesis*. J Pathol, 2004. **203**(2): p. 631-7.
50. Meinhardt, J., J. Radke, C. Dittmayer, J. Franz, C. Thomas, R. Mothes, et al., *Olfactory transmucosal SARS-CoV-2 invasion as a port of central nervous system entry in individuals with COVID-19*. Nat Neurosci, 2021. **24**(2): p. 168-175.
51. Boldrini, M., P.D. Canoll, and R.S. Klein, *How COVID-19 Affects the Brain*. JAMA Psychiatry, 2021. 10.1001/jamapsychiatry.2021.0500.
52. Deffner, F., M. Scharr, S. Klingenstein, M. Klingenstein, A. Milazzo, S. Scherer, et al., *Histological Evidence for the Enteric Nervous System and the Choroid Plexus as Alternative Routes of Neuroinvasion by SARS-CoV2*. Front Neuroanat, 2020. **14**: p. 596439.
53. Yang, A.C., F. Kern, P.M. Losada, M.R. Agam, C.A. Maat, G.P. Schmartz, et al., *Dysregulation of brain and choroid plexus cell types in severe COVID-19*. Nature, 2021. 10.1038/s41586-021-03710-0.
54. Awogbindin, I.O., B. Ben-Azu, B.A. Olusola, E.T. Akinluyi, P.A. Adeniyi, T. Di Paolo, et al., *Microglial Implications in SARS-CoV-2 Infection and COVID-19: Lessons From Viral RNA Neurotropism and Possible Relevance to Parkinson's Disease*. Front Cell Neurosci, 2021. **15**: p. 670298.
55. Politi, L.S., E. Salsano, and M. Grimaldi, *Magnetic Resonance Imaging Alteration of the Brain in a Patient With Coronavirus Disease 2019 (COVID-19) and Anosmia*. JAMA Neurol, 2020. 10.1001/jamaneurol.2020.2125.
56. Green, C., H. Morrison, P. Smith, F. Golestani, C. Rice, E. Coulthard, et al., *Teaching Neuroimages: COVID-19 associated acute disseminated encephalomyelitis with corpus callosal hemorrhage*. Neurology, 2020. 10.1212/WNL.00000000000011001.
57. Einsiedler, M., P. Voulleminot, S. Demuth, P. Kalaaji, T. Bogdan, L. Gauer, et al., *A rise in cases of nitrous oxide abuse: neurological complications and biological findings*. J Neurol, 2021. 10.1007/s00415-021-10702-7.
58. Garcia-Monco, J.C., I.E. Cortina, E. Ferreira, A. Martinez, L. Ruiz, A. Cabrera, et al., *Reversible splenic lesion syndrome (RESLES): what's in a name?* J Neuroimaging, 2011. **21**(2): p. e1-14.
59. Helms, J., S. Kremer, H. Merdji, R. Clere-Jehl, M. Schenck, C. Kummerlen, et al., *Neurologic Features in Severe SARS-CoV-2 Infection*. N Engl J Med, 2020. **382**(23): p. 2268-2270.
60. Kandemirli, S.G., L. Dogan, Z.T. Sarikaya, S. Kara, C. Akinci, D. Kaya, et al., *Brain MRI Findings in Patients in the Intensive Care Unit with COVID-19 Infection*. Radiology, 2020. 10.1148/radiol.2020201697: p. 201697.
61. Coolen, T., V. Lolli, N. Sadeghi, A. Rovai, N. Trotta, F.S. Taccone, et al., *Early postmortem brain MRI findings in COVID-19 non-survivors*. Neurology, 2020. **95**(14): p. e2016-e2027.

62. Matschke, J., M. Lutgehetmann, C. Hagel, J.P. Sperhake, A.S. Schroder, C. Edler, et al., *Neuropathology of patients with COVID-19 in Germany: a post-mortem case series*. Lancet Neurol, 2020. **19**(11): p. 919-929.
63. Fajgenbaum, D.C. and C.H. June, *Cytokine Storm*. N Engl J Med, 2020. **383**(23): p. 2255-2273.
64. Espindola, O.M., Y.C.P. Gomes, C.O. Brandao, R.C. Torres, M. Siqueira, C.N. Soares, et al., *Inflammatory cytokine patterns associated with neurological diseases in COVID-19*. Ann Neurol, 2021. 10.1002/ana.26041.
65. Moore, J.B. and C.H. June, *Cytokine release syndrome in severe COVID-19*. Science, 2020. **368**(6490): p. 473-474.
66. Alexopoulos, H., E. Magira, K. Bitzogli, N. Kafasi, P. Vlachoyiannopoulos, A. Tzioufas, et al., *Anti-SARS-CoV-2 antibodies in the CSF, blood-brain barrier dysfunction, and neurological outcome: Studies in 8 stuporous and comatose patients*. Neurol Neuroimmunol Neuroinflamm, 2020. **7**(6).
67. Dalakas, M.C., *Guillain-Barre syndrome: The first documented COVID-19-triggered autoimmune neurologic disease: More to come with myositis in the offing*. Neurol Neuroimmunol Neuroinflamm, 2020. **7**(5).
68. Taquet, M., J.R. Geddes, M. Husain, S. Luciano, and P.J. Harrison, *6-month neurological and psychiatric outcomes in 236 379 survivors of COVID-19: a retrospective cohort study using electronic health records*. Lancet Psychiatry, 2021. 10.1016/S2215-0366(21)00084-5.
69. Mattioli, F., C. Stampatori, F. Righetti, E. Sala, C. Tomasi, and G. De Palma, *Neurological and cognitive sequelae of Covid-19: a four month follow-up*. J Neurol, 2021. 10.1007/s00415-021-10579-6.
70. Lucas, C., P. Wong, J. Klein, T.B.R. Castro, J. Silva, M. Sundaram, et al., *Longitudinal analyses reveal immunological misfiring in severe COVID-19*. Nature, 2020. **584**(7821): p. 463-469.
71. Dani, M., A. Dirksen, P. Taraborrelli, M. Torocastro, D. Panagopoulos, R. Sutton, et al., *Autonomic dysfunction in 'long COVID': rationale, physiology and management strategies*. Clin Med (Lond), 2021. **21**(1): p. e63-e67.
72. Watari, M., S. Nakane, A. Mukaino, M. Nakajima, Y. Mori, Y. Maeda, et al., *Autoimmune postural orthostatic tachycardia syndrome*. Ann Clin Transl Neurol, 2018. **5**(4): p. 486-492.
73. Guedj, E., J.Y. Champion, P. Dudouet, E. Kaphan, F. Bregeon, H. Tissot-Dupont, et al., *(18)F-FDG brain PET hypometabolism in patients with long COVID*. Eur J Nucl Med Mol Imaging, 2021. 10.1007/s00259-021-05215-4.
74. Hugon, J., E.F. Msika, M. Queneau, K. Farid, and C. Paquet, *Long COVID: cognitive complaints (brain fog) and dysfunction of the cingulate cortex*. J Neurol, 2021. 10.1007/s00415-021-10655-x.
75. Delorme, C., O. Paccoud, A. Kas, A. Hesters, S. Bombois, P. Shambrook, et al., *COVID-19-related encephalopathy: a case series with brain FDG-positron-emission tomography/computed tomography findings*. Eur J Neurol, 2020. **27**(12): p. 2651-2657.
76. Kas, A., M. Soret, N. Pyatigorskaya, M.O. Habert, A. Hesters, L. Le Guennec, et al., *The cerebral network of COVID-19-related encephalopathy: a longitudinal voxel-based 18F-FDG-PET study*. Eur J Nucl Med Mol Imaging, 2021. **48**(8): p. 2543-2557.
77. Rudroff, T., A.C. Fietsam, J.R. Deters, A.D. Bryant, and J. Kamholz, *Post-COVID-19 Fatigue: Potential Contributing Factors*. Brain Sci, 2020. **10**(12).

78. Butler, M., J. Coebergh, F. Safavi, A. Carson, M. Hallett, B. Michael, et al., *Functional Neurological Disorder After SARS-CoV-2 Vaccines: Two Case Reports and Discussion of Potential Public Health Implications*. *J Neuropsychiatry Clin Neurosci*, 2021. 10.1176/appi.neuropsych.21050116: p. appineuropsych21050116.
79. Nistico, V., D. Goeta, O. Gambini, and B. Demartini, *The psychological impact of COVID-19 among a sample of Italian patients with functional neurological disorders: A preliminary study*. *Parkinsonism Relat Disord*, 2020. **78**: p. 79-81.
80. Valente, K.D., R. Alessi, G. Baroni, R. Marin, B. Dos Santos, and A. Palmi, *The COVID-19 outbreak and PNES: The impact of a ubiquitously felt stressor*. *Epilepsy Behav*, 2021. **117**: p. 107852.
81. Kim, D.D., C.S. Kung, and D.L. Perez, *Helping the Public Understand Adverse Events Associated With COVID-19 Vaccinations: Lessons Learned From Functional Neurological Disorder*. *JAMA Neurol*, 2021. **78**(7): p. 789-790.

## 7. TABLAS

Tabla 1. Síndrome post-COVID-19. Definición y criterios según NICE

- 
- Conjunto de signos y síntomas que suceden durante o después de una infección compatible con COVID-19 y continúan durante más de 12 semanas y no se explican por un diagnóstico alternativo.
  - Los síntomas se presentan con frecuencia superpuestos y pueden fluctuar y cambiaren el tiempo, a veces a modo de brotes, y afectan a cualquier sistema incluyendo el sistema cardiovascular y respiratorio, gastrointestinal, neurológico y musculo-esquelético, endocrino, renal, dermatológico, otorrinolaringológico, hematológico además de síntomas psiquiátricos, y otros como dolor generalizado, fatiga y/o fiebre persistente.
  - Para su diagnóstico no es necesario una historia previa de COVID-19 confirmada mediante PCR.
  - Su diagnóstico puede considerarse antes de las 12 semanas, mientras se evalúa una posible enfermedad subyacente alternativa.
- 

NICE: Instituto Nacional para la Salud y Excelencia en el Cuidado.

Adaptado de Ref [8]



Tabla 2. Limitaciones metodológicas de los estudios publicados sobre síndrome post-COVID-19

---

- Definiciones variables y no estandarizadas
  - Criterios de inclusión heterogéneos
    - \* Persistencia de un síntoma único frente a agregados de síntomas
    - \* Presencia de daño orgánico versus síntomas subjetivos
    - \* Síntomas neurológicos y cognitivos no evaluados de modo sistemático
  - Diferencias en el momento de evaluación y el tiempo de seguimiento
  - Diferencias en el tipo de evaluación:
    - \* Entrevista telefónica vs exploración física
    - \* Datos subjetivos procedentes de aplicaciones digitales
  - Muestras heterogéneas en relación a variables clínicamente relevantes
    - \* Edad
    - \* Gravedad: COVID leve o asintomático / COVID grave
    - \* Tamaño de muestra
  - Ausencia de grupo control
-

Tabla 3. Propuesta de clasificación de los síntomas neurológicos post-COVID

---

1. Cefalea

- Cefalea tensional
- Cefalea crónica diaria
- Otras

2. Afectación de nervios craneales

- Anosmia / hiposmia
- Ageusia / disgeusia
- Acúfenos
- Pérdida/disminución de la audición
- Mareo y vértigo no especificado
- Problemas de equilibrio
- Disfonía

3. Afectación musculo-esquelética

- Mialgias
- Debilidad muscular
- Fatiga crónica
- Trastornos de la movilidad
- Parestesias en extremidades
- Dolor neurogénico, dolor lumbar y/o osteo-articular

4. Trastornos del movimiento

- Temblor en extremidades
- Problemas de coordinación

5. Trastornos del sueño / insomnio

6. Alteración del sistema nervioso autónomo

- Trastornos de la termorregulación

- Intolerancia ortostática
- Intolerancia al ejercicio
- Taquicardia postural ortostática
- Otros

#### 7. Síntomas cognitivos y “niebla mental”

- Problemas de memoria
- Déficit de atención
- Dificultad de concentración
- Dificultades en el proceso de decisión
- Tiempo de reacción disminuido
- Trastornos del lenguaje

#### 8. Síntomas de índole psicológica y psiquiátrica asociados

- Ansiedad
  - Depresión
  - Trastorno de estrés post-traumático
  - Otros
-
